# Supplementary material
Source: MDPI journal article supplement (https://www.mdpi.com/2073-445X/12/3/660)
Supplement: s1 [file s1]

**Table S1.** Summary table about greenery level and the Land use and cover by Corine revised classification, according to NDVI values in different districts of the study area. First and last column present fourth level Corine codes and relate description. Other columns are representative for 6 districts in the study area. Coloured cells correspond to NDVI level of greenery for a district and a specific Land cover (low vegetation cover in red with  $NDVI < 0$ , medium vegetation cover in yellow with  $0 < NDVI < 0.15$ , and high vegetation cover in green with  $NDVI \geq 0.15$ )

| CLC  | q1 | q2 | q3 | q4 | q5 | q6 | Description                                                                    |
|------|----|----|----|----|----|----|--------------------------------------------------------------------------------|
| 1111 |    |    |    |    |    |    | Areas of urban centre                                                          |
| 1112 |    |    |    |    |    |    | Areas of ancient cores                                                         |
| 1121 |    |    |    |    |    |    | Discontinuous built-up areas with multi-flat houses prevailing without gardens |
| 1122 |    |    |    |    |    |    | Discontinuous built-up areas with family houses with gardens                   |
| 1211 |    |    |    |    |    |    | Industrial, artisanal, and agricultural productive units                       |
| 1212 |    |    |    |    |    |    | agro-zootechnical settlements                                                  |
| 1213 |    |    |    |    |    |    | Commercial settlements                                                         |
| 1214 |    |    |    |    |    |    | Public and private settlements                                                 |
| 1215 |    |    |    |    |    |    | Hospital settlements                                                           |
| 1221 |    |    |    |    |    |    | highways and expressways                                                       |
| 1222 |    |    |    |    |    |    | road networks                                                                  |
| 1223 |    |    |    |    |    |    | Green areas associated with the road system                                    |
| 1224 |    |    |    |    |    |    | Rail networks and ancillary spaces                                             |
| 1227 |    |    |    |    |    |    | Networks and areas for distribution, production, and energy transport          |
| 1228 |    |    |    |    |    |    | Photovoltaic installations                                                     |
| 1229 |    |    |    |    |    |    | Networks and areas for water distribution                                      |
| 1331 |    |    |    |    |    |    | Construction sites, spaces under construction and excavations                  |
| 1332 |    |    |    |    |    |    | Remediated and artifact soils                                                  |
| 1411 |    |    |    |    |    |    | Parks                                                                          |
| 1412 |    |    |    |    |    |    | Villas                                                                         |
| 1413 |    |    |    |    |    |    | Uncultivated areas in the urban                                                |
| 1422 |    |    |    |    |    |    | Sport areas                                                                    |
| 2121 |    |    |    |    |    |    | Simple arable land                                                             |
| 2122 |    |    |    |    |    |    | Nurseries                                                                      |
| 2123 |    |    |    |    |    |    | Horticultural crops in open field, greenhouse and under plastic                |
| 2210 |    |    |    |    |    |    | Vineyard                                                                       |
| 2220 |    |    |    |    |    |    | Orchard and minor fruits                                                       |
| 2310 |    |    |    |    |    |    | Stable meadows                                                                 |
| 2420 |    |    |    |    |    |    | Complex and particle cropping systems                                          |
| 3113 |    |    |    |    |    |    | Forests dominated by willows and poplars                                       |
| 3116 |    |    |    |    |    |    | Ruderal forests                                                                |
| 3231 |    |    |    |    |    |    | Areas with shrubs and/or herbaceous vegetation with scattered trees            |
| 5111 |    |    |    |    |    |    | Riverbeds and streams with sparse vegetation                                   |
| 5112 |    |    |    |    |    |    | River and stream beds with abundant vegetation                                 |

|      |  |  |  |  |  |  |       |
|------|--|--|--|--|--|--|-------|
| 5113 |  |  |  |  |  |  | Banks |
|------|--|--|--|--|--|--|-------|
